# Supplementary material
Source: PubMed Central journal article supplement (PMC10638861)

Figure S1

**A**

|                         | Total | Healthy | Early | Late | nonCoV |
|-------------------------|-------|---------|-------|------|--------|
| Luminex                 | 95    | 29      | 25    | 24   | 17     |
| Antibody                | 103   | 29      | 31    | 24   | 19     |
| Bulk ATAC-CD14          | 32    | 12      | 12    | 2    | 6      |
| Bulk ATAC-CD34          | 15    | 5       | 6     | 2    | 2      |
| 10X Multiome snRNA/ATAC | 30+2* | 7+1*    | 4+1*  | 8    | 5      |
| Flow cytometry          | 78    | 23      | 21    | 19   | 15     |

Luminex, Luminex-18-plex inflammatory cytokine panel

\*snATAC-only

**B**

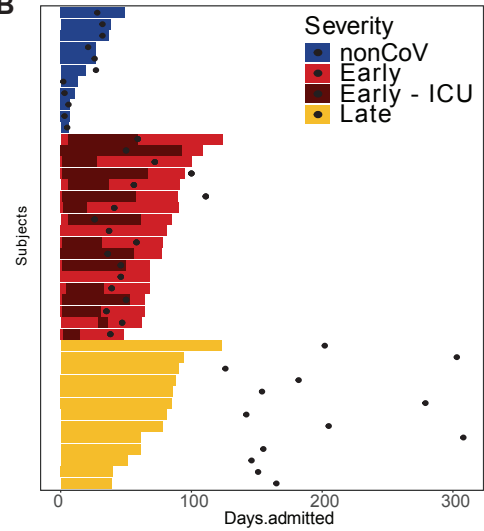

**C**

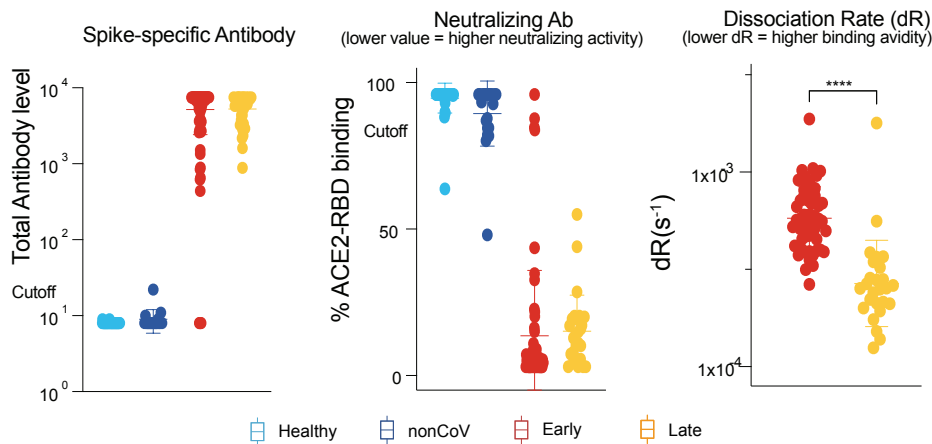

**D**

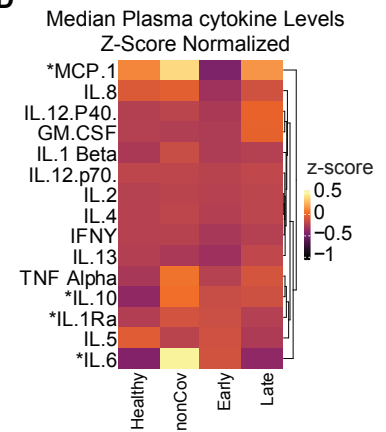

**E**

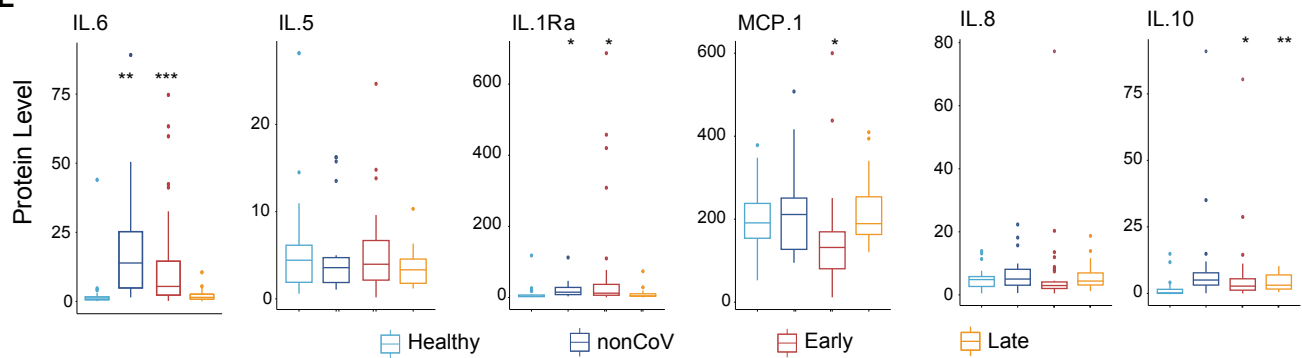

**F**

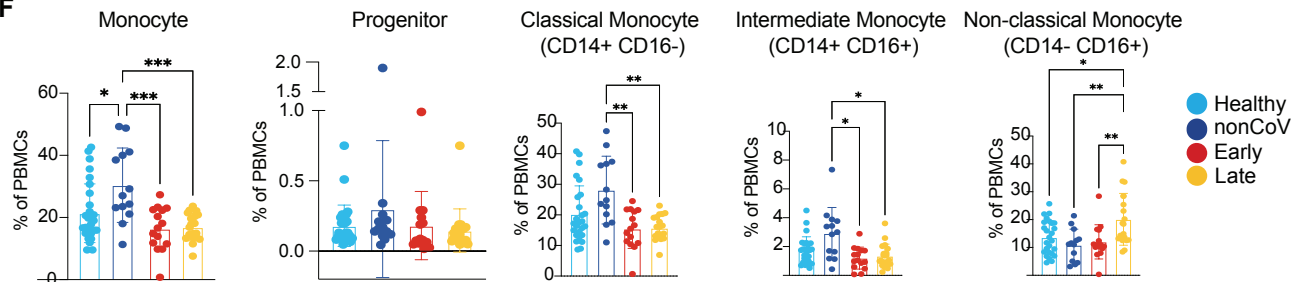

Supplement: NIHMS1925619-supplement-1.pdf [file NIHMS1925619-supplement-1.pdf]
