# Supplementary material
Source: PubMed Central journal article supplement (PMC10638861)

Figure S2

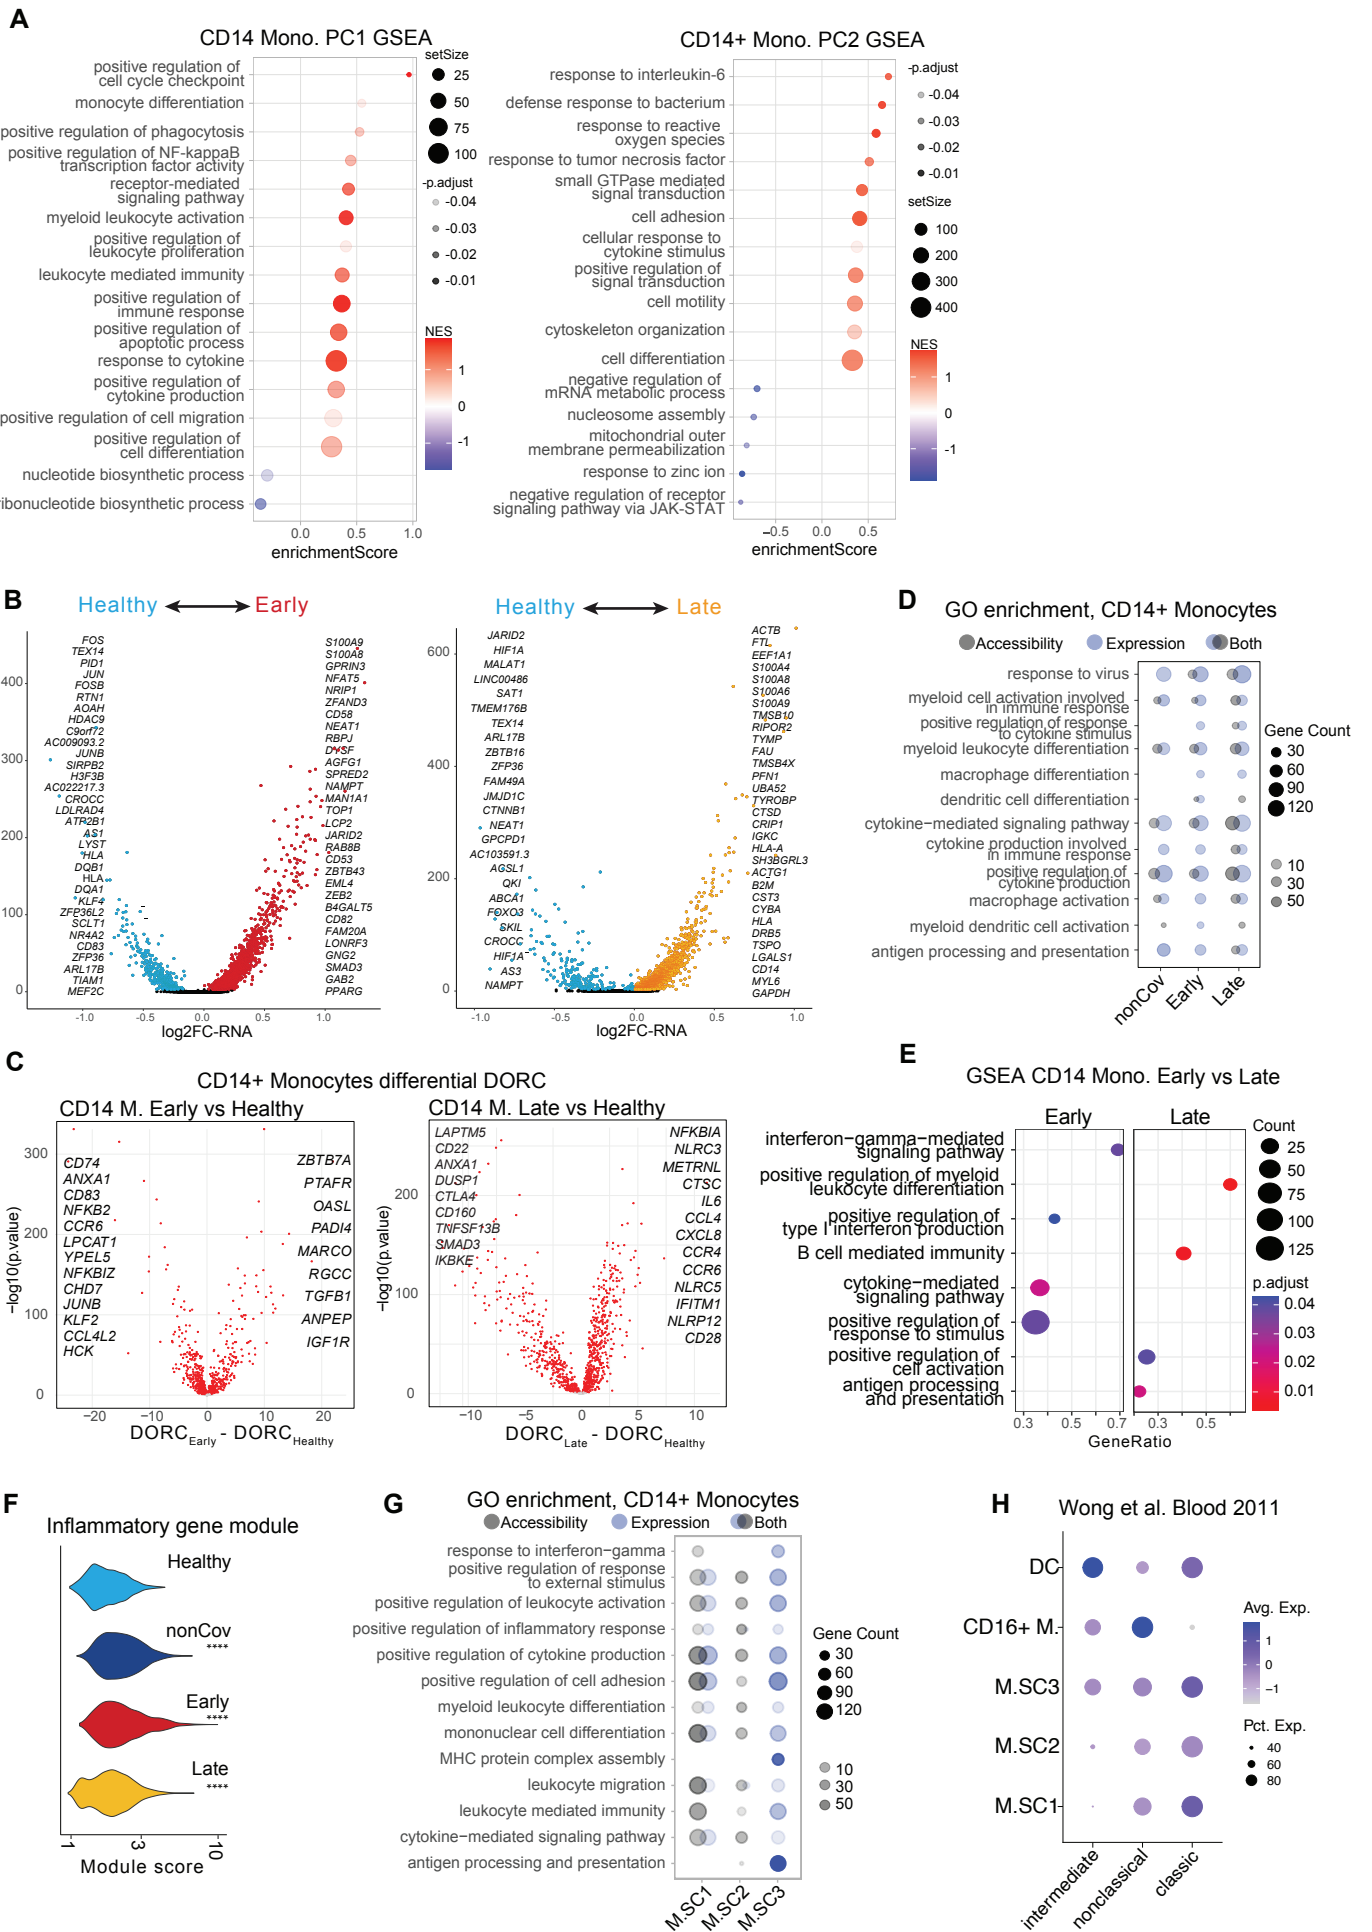

Supplement: NIHMS1925619-supplement-2.pdf [file NIHMS1925619-supplement-2.pdf]

Figure S3

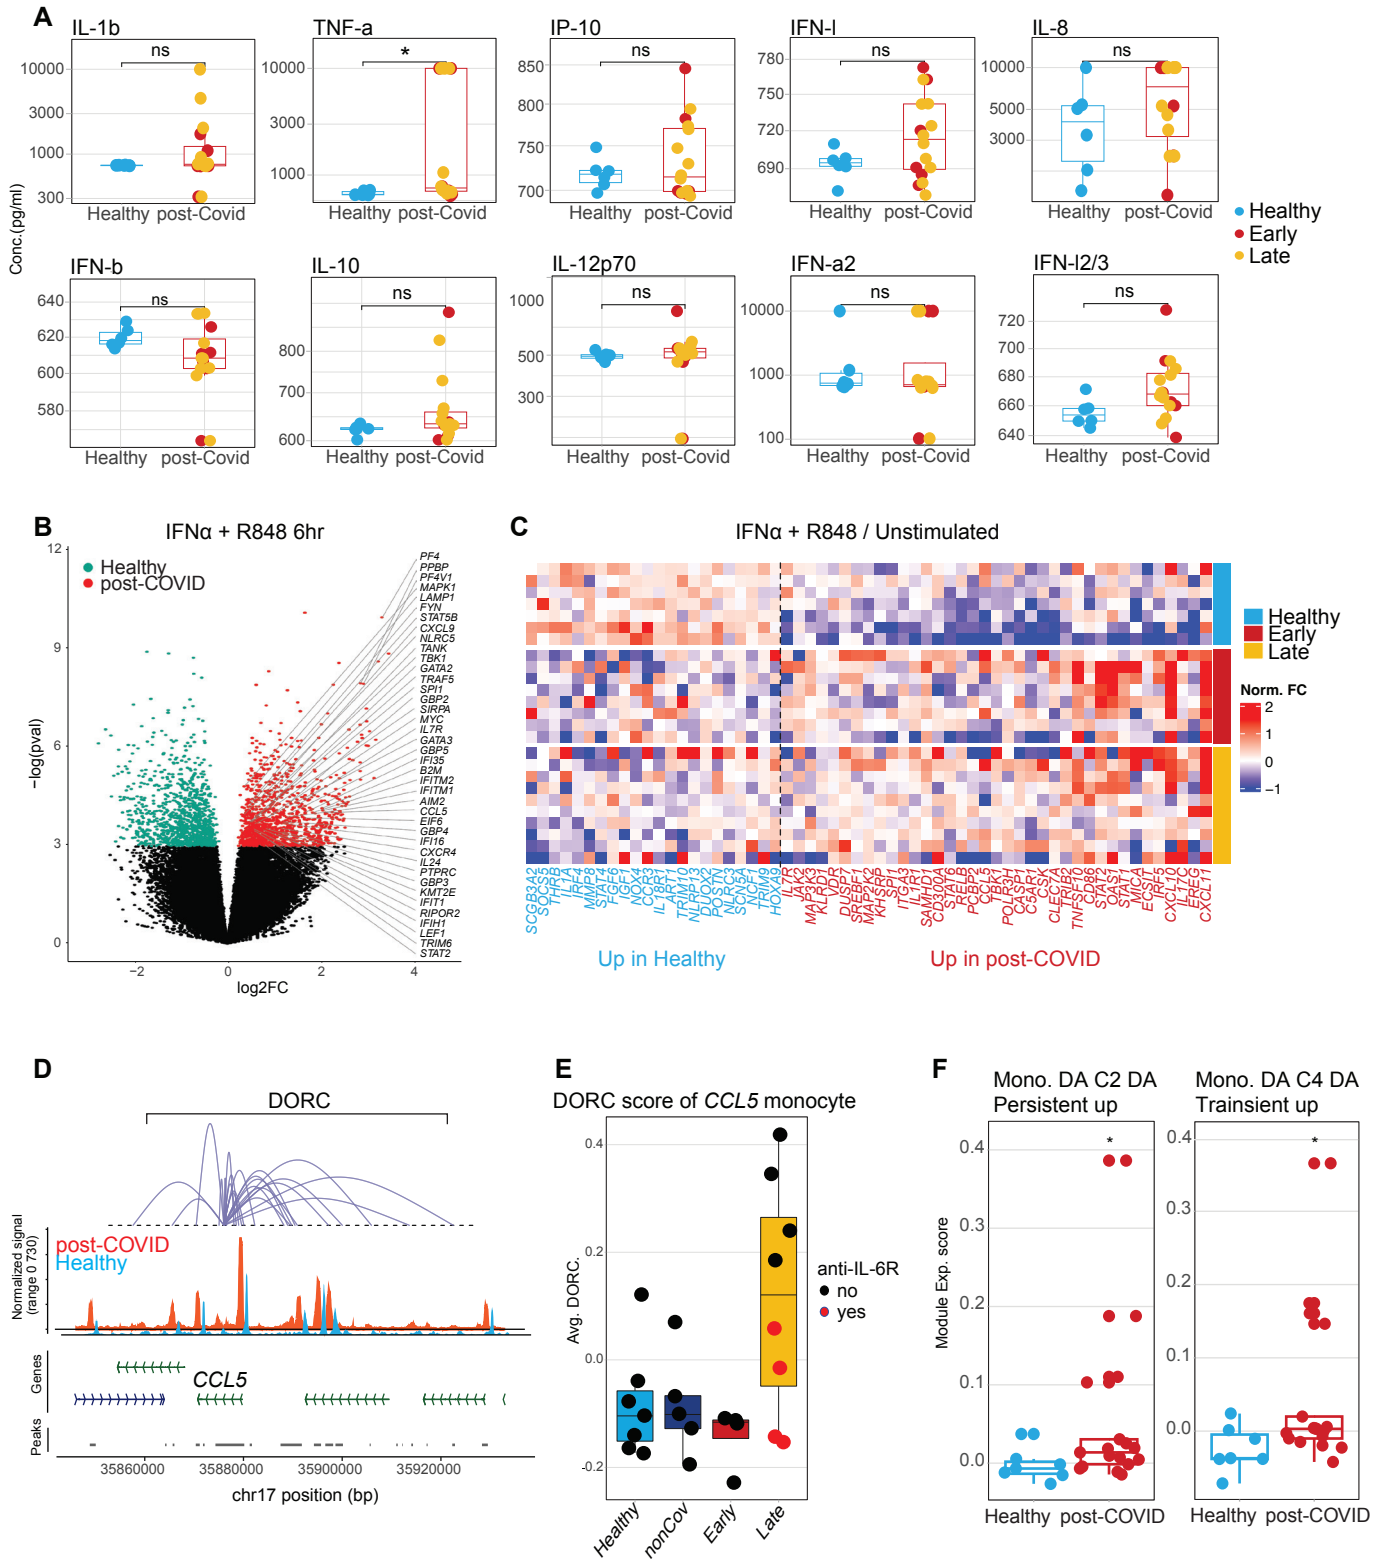

Supplement: NIHMS1925619-supplement-3.pdf [file NIHMS1925619-supplement-3.pdf]

Figure S4

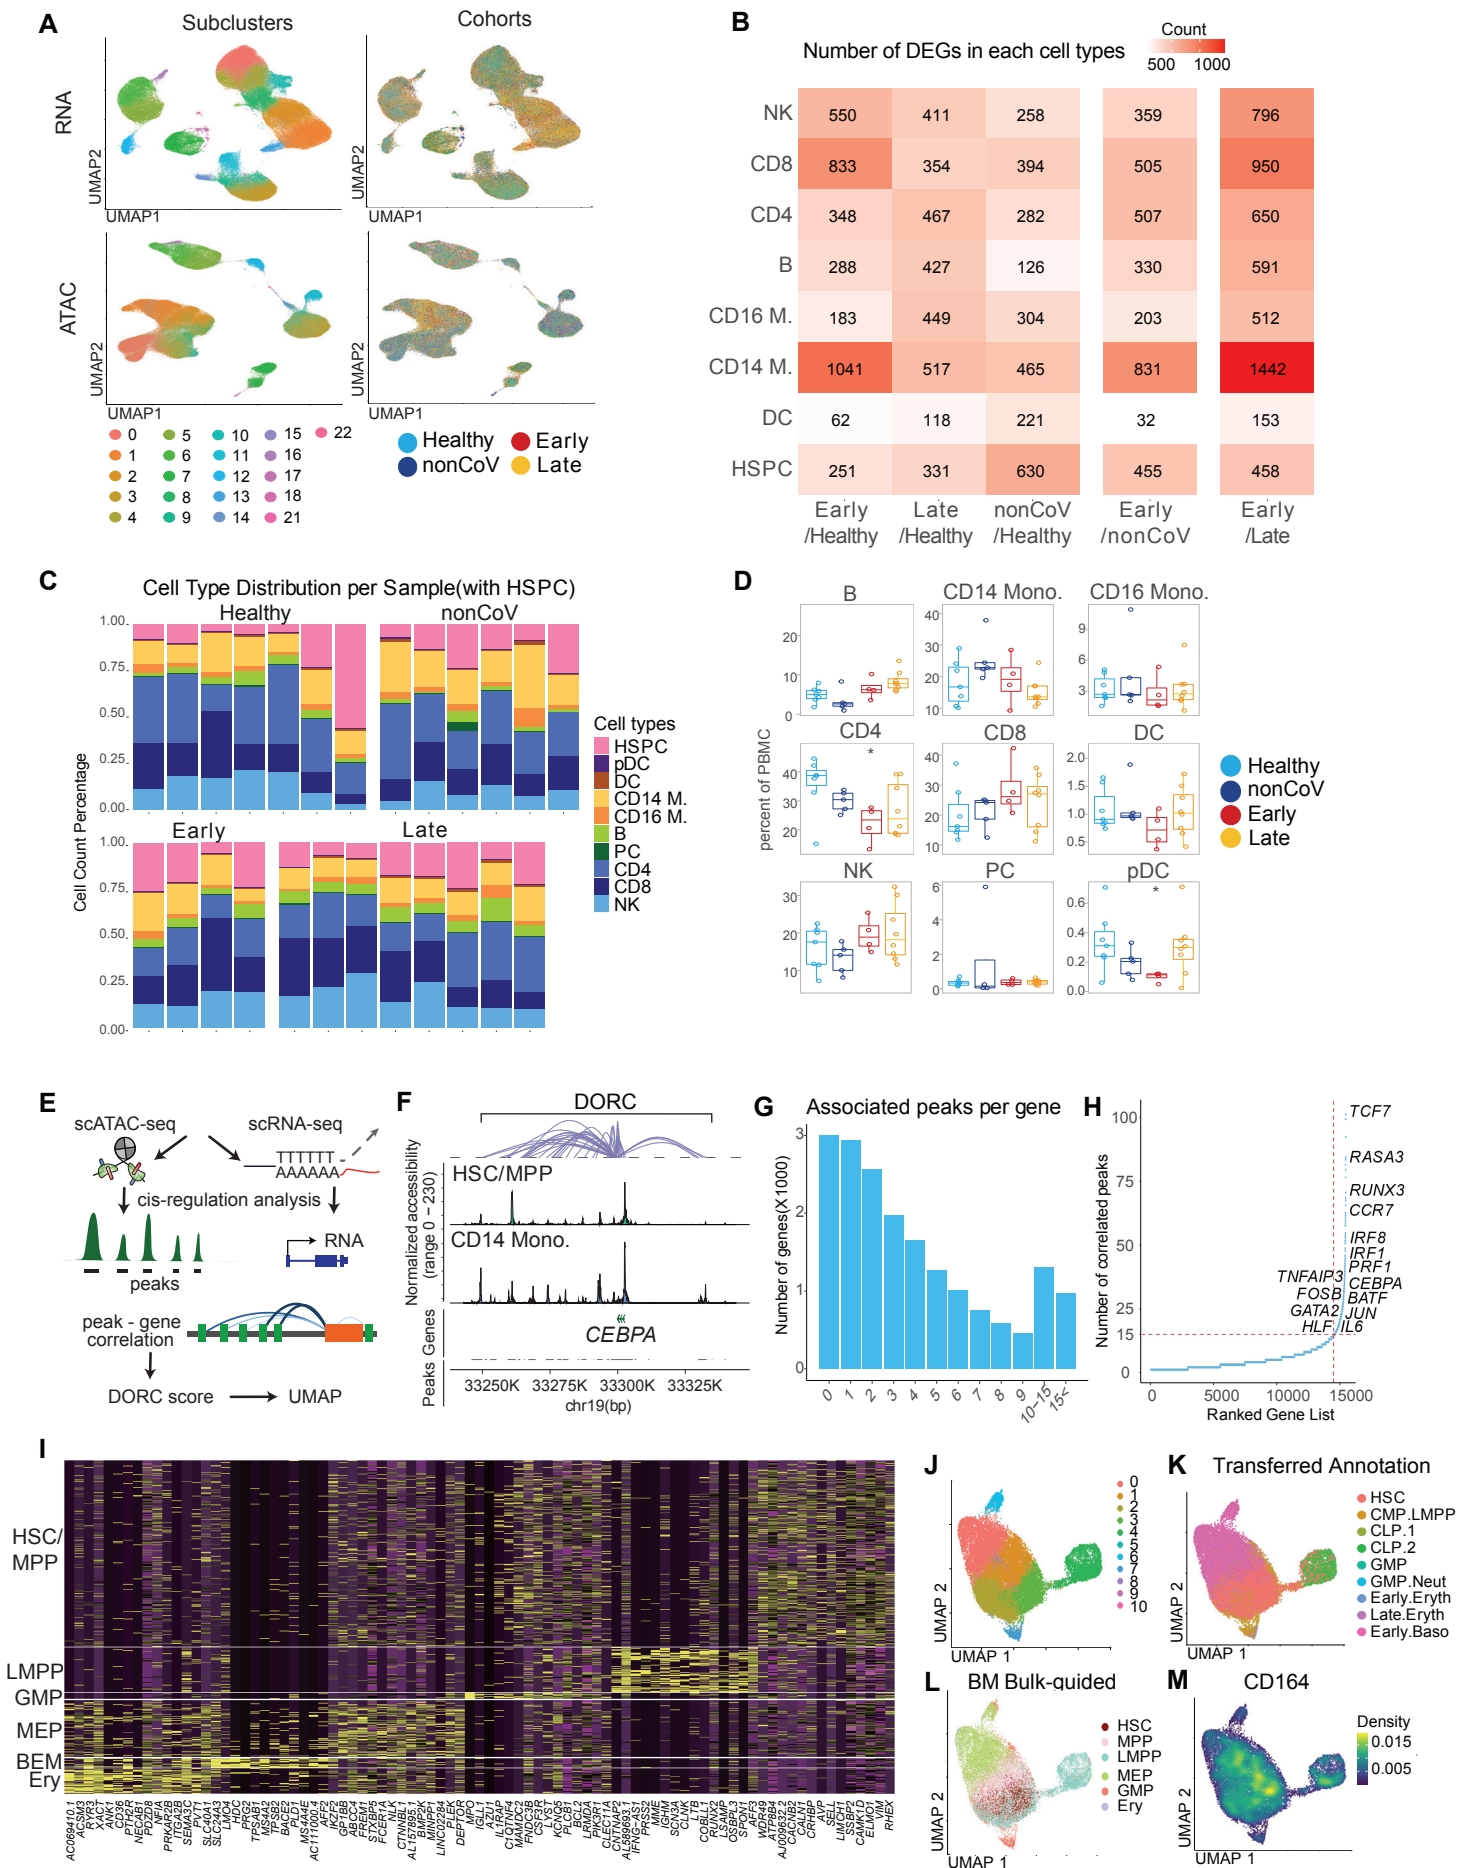

Supplement: NIHMS1925619-supplement-4.pdf [file NIHMS1925619-supplement-4.pdf]

Figure S5

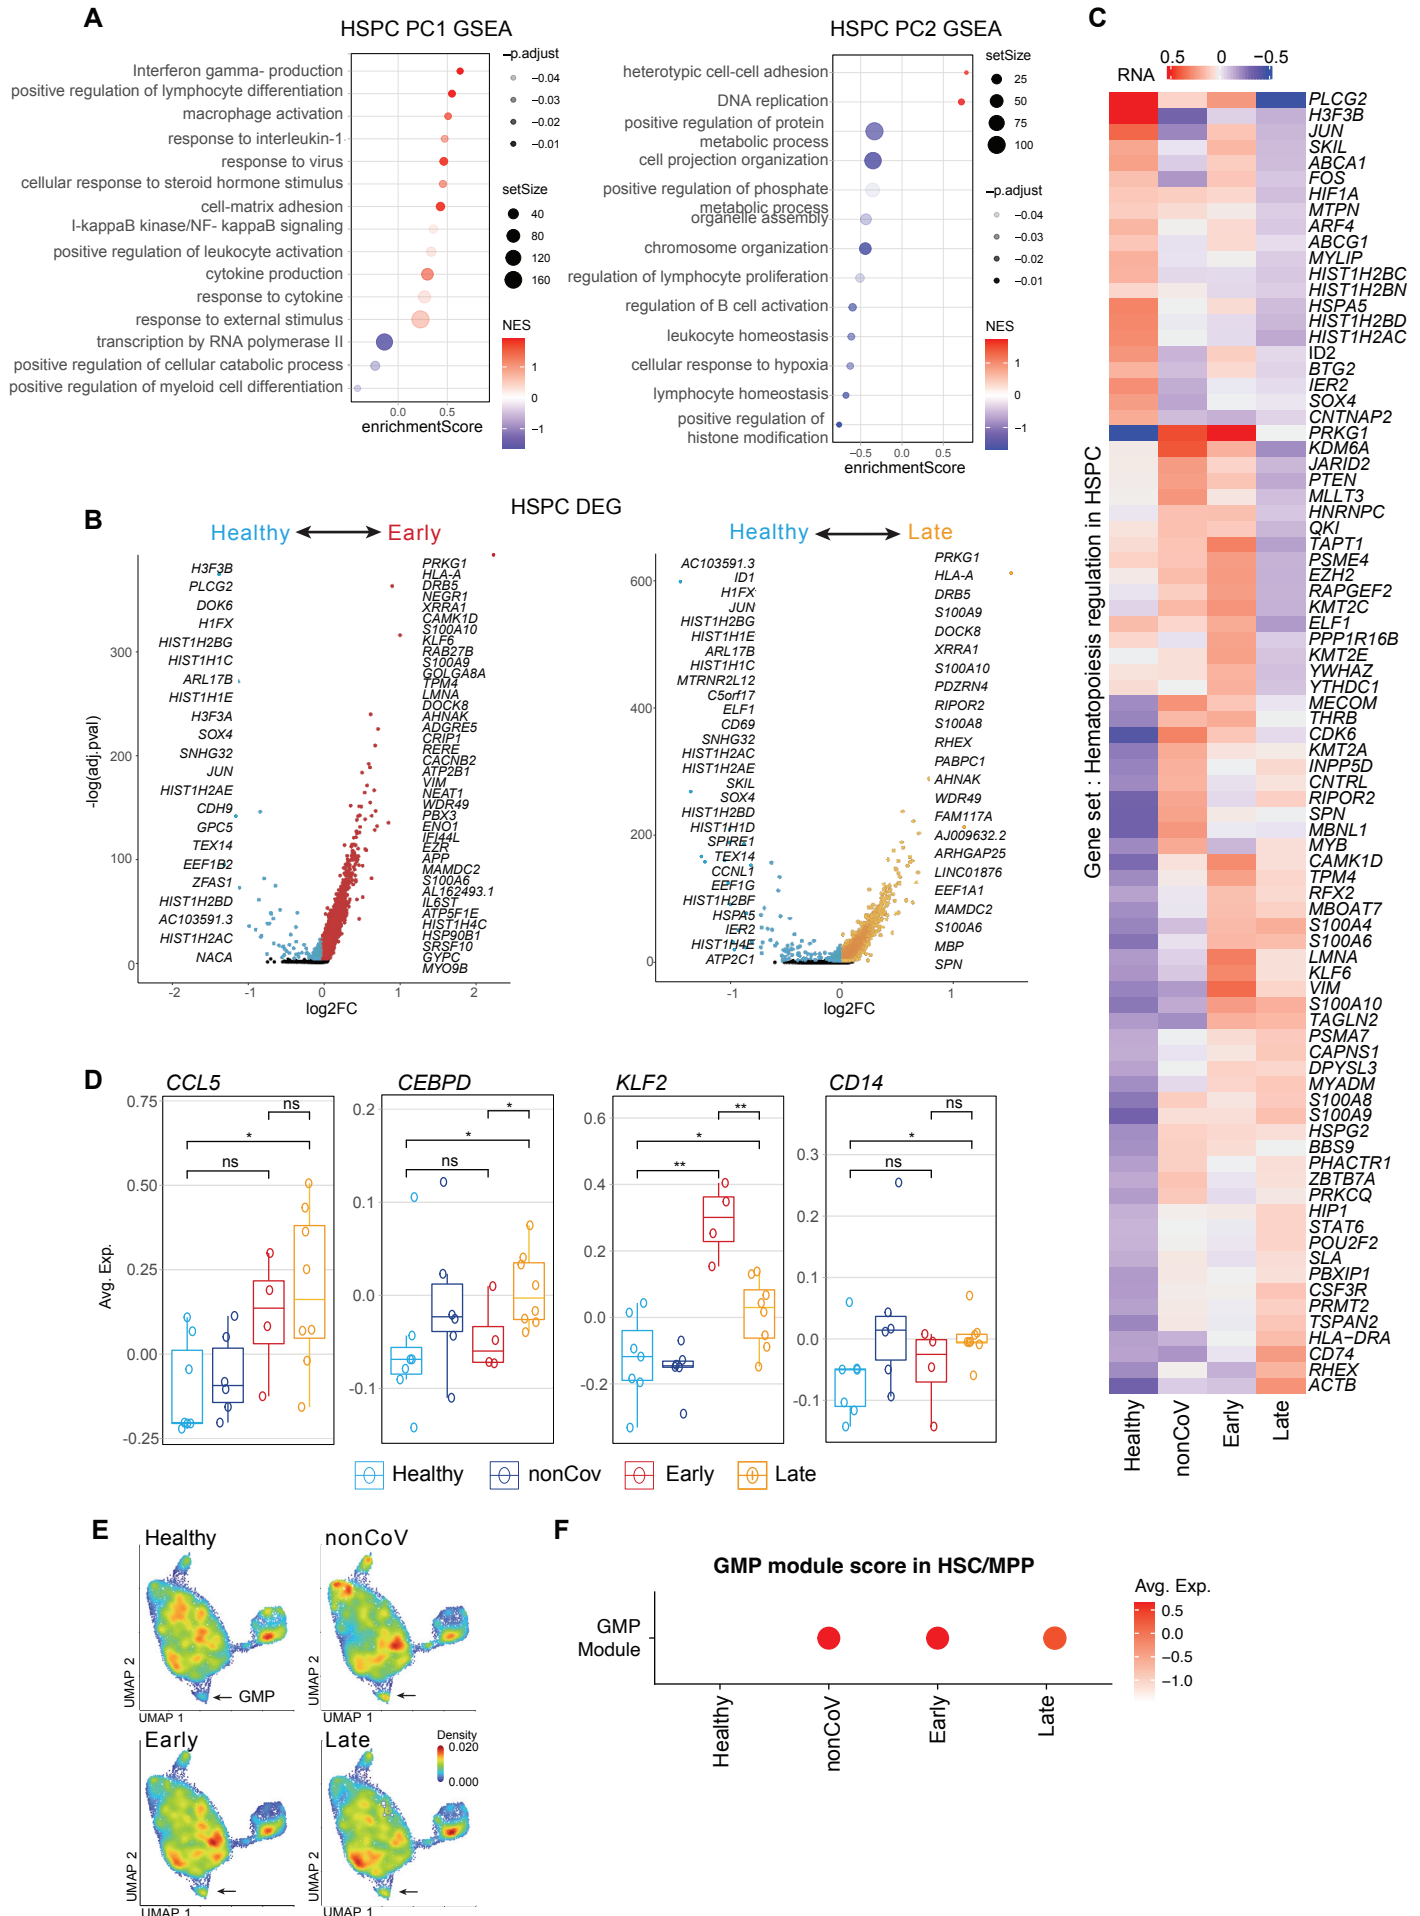

Supplement: NIHMS1925619-supplement-5.pdf [file NIHMS1925619-supplement-5.pdf]

Figure S7

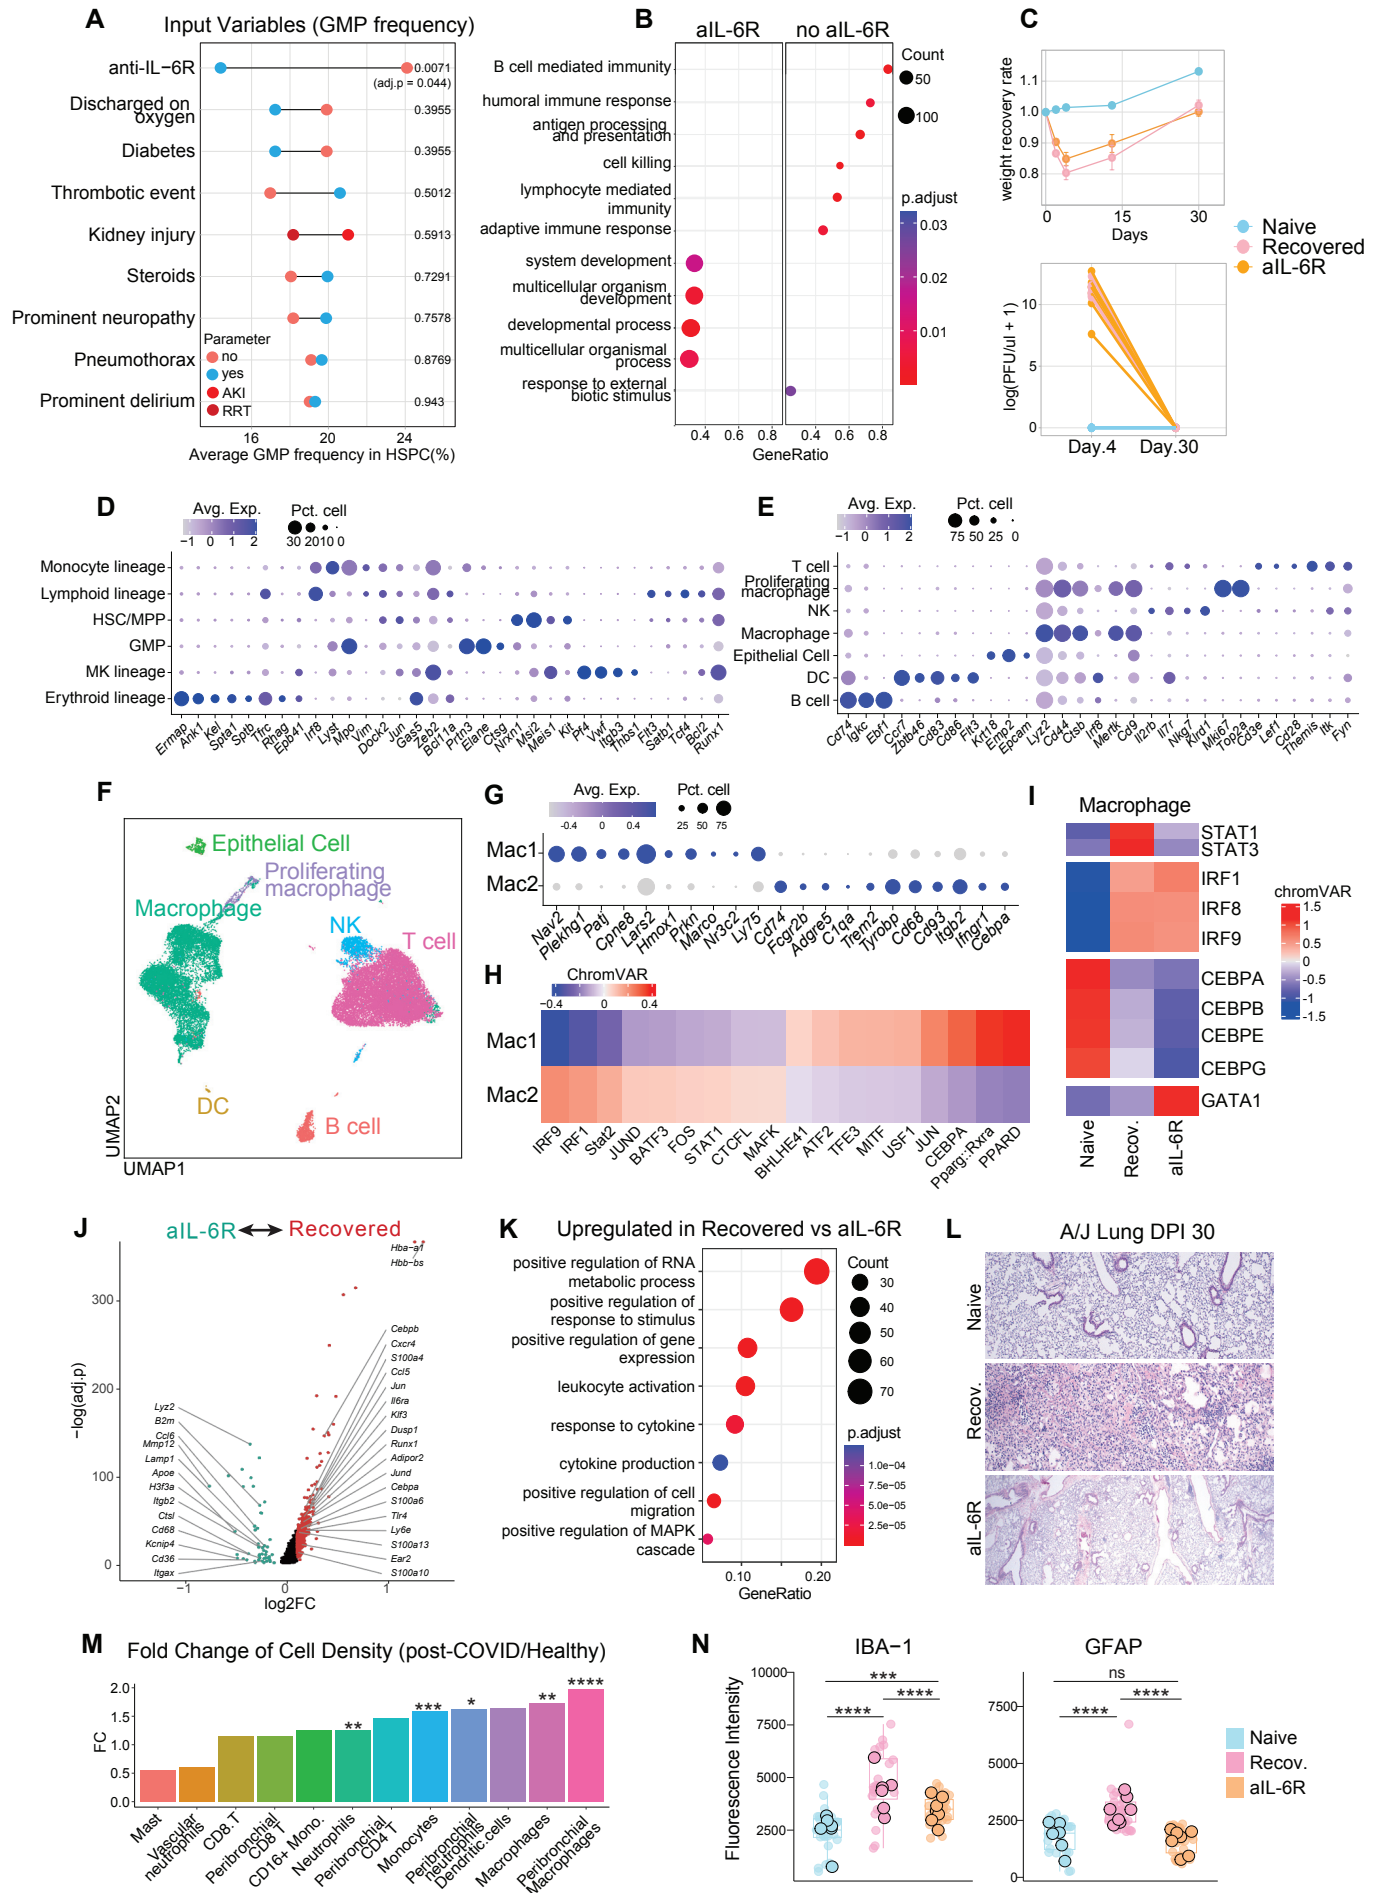

Supplement: NIHMS1925619-supplement-7.pdf [file NIHMS1925619-supplement-7.pdf]
